# Supplementary material for: Cetuximab-Induced MET Activation Acts as a Novel Resistance Mechanism in Colon Cancer Cells
Source: Int J Mol Sci. 2014 Apr 4;15(4):5838–51. doi: 10.3390/ijms15045838 (PMC4013599; doi:10.3390/ijms15045838)
Supplement: Supplementary file 1 [file ijms-15-05838-s001.pdf]

## Supplementary Information

**Table S1.** Summary of cetuximab sensitivity and genotypical data of seven kinds cell lines used in experiments.

| Cell line | Cell viability (%)<br>at 10 µg/mL 72 h | Cetuximab<br>sensitive | KRAS<br>mutation | BRAF<br>mutation | PIK3CA<br>mutation | PTEN<br>deficiency |
|-----------|----------------------------------------|------------------------|------------------|------------------|--------------------|--------------------|
| SW480     | 98.25 ± 0.33                           | No                     | Yes              | WT               | WT                 | No                 |
| HCT-116   | 102.54 ± 2.38                          | No                     | Yes              | WT               | Yes                | No                 |
| DLD-1     | 85.91 ± 2.38                           | No                     | Yes              | WT               | Yes                | No                 |
| HT-29     | 89.16 ± 1.74                           | No                     | WT               | Yes              | WT                 | No                 |
| RKO       | 85.18 ± 2.24                           | No                     | WT               | Yes              | Yes                | No                 |
| Caco-2    | 77.06 ± 3.78                           | No                     | WT               | WT               | WT                 | No                 |
| DiFi      | 50.78 ± 6.81                           | Yes                    | WT               | WT               | WT                 | No                 |

© 2014 by the authors; licensee MDPI, Basel, Switzerland. This article is an open access article distributed under the terms and conditions of the Creative Commons Attribution license (<http://creativecommons.org/licenses/by/3.0/>).
